# Supplementary material for: A cheap and facile route to synthesize monodisperse magnetic nanocrystals and their application as MRI agents
Source: Royal Society of Chemistry journal article supplement (doi:10.1039/c4dt02425g), 2014-10-17
Supplement: c4dt02425g1.pdf [file c4dt02425g1.pdf]

## **Electronic Supplementary Information**

### **A cheap and facile route to synthesize monodisperse magnetic nanocrystals and application as MRI agent**

Guixin Yang, Fei He,\* Ruichan Lv, Shili Gai, Ziyong Cheng, Yunlu Dai, and  
Piaoping Yang\*

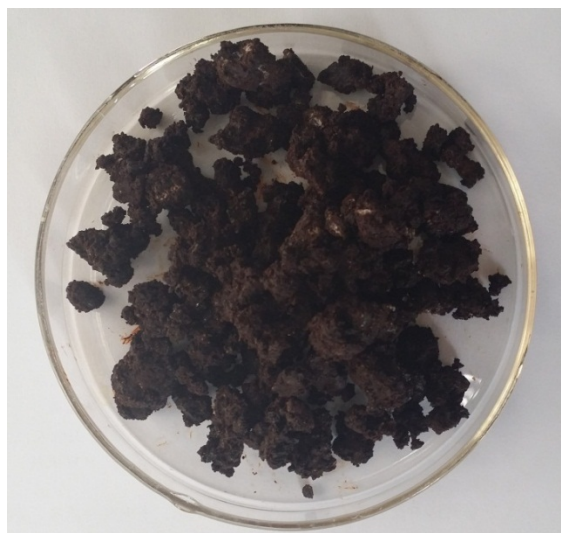

**Fig. S1** A photograph of a Petri dish containing 40 g of MnFe<sub>2</sub>O<sub>4</sub> nanocrystals.

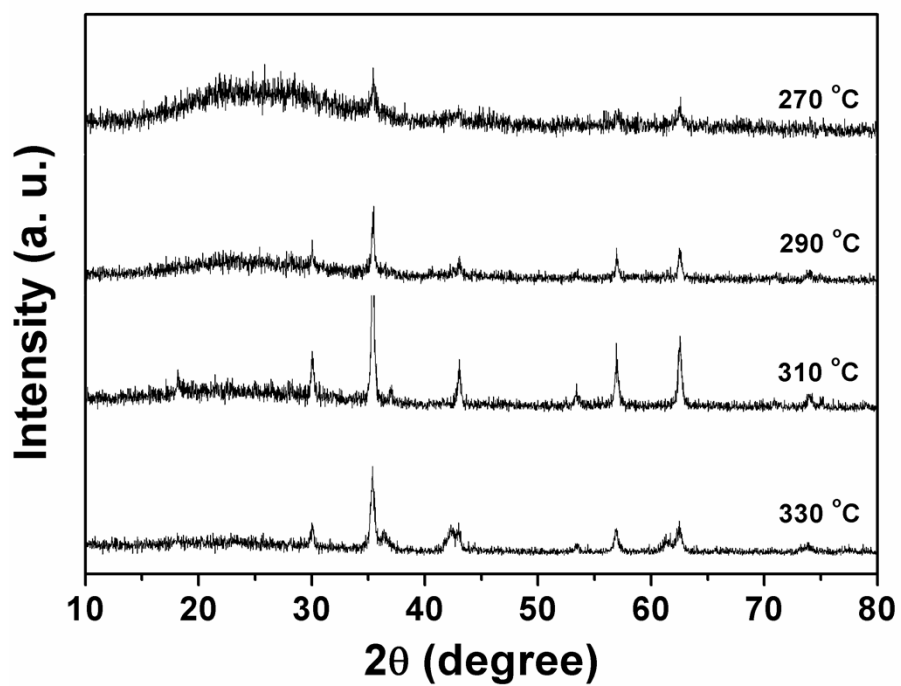

**Fig. S2** XRD patterns of CoFe<sub>2</sub>O<sub>4</sub> NCs synthesized for reaction time of 2 h at 270 °C, 290 °C, 310 °C and 330 °C.

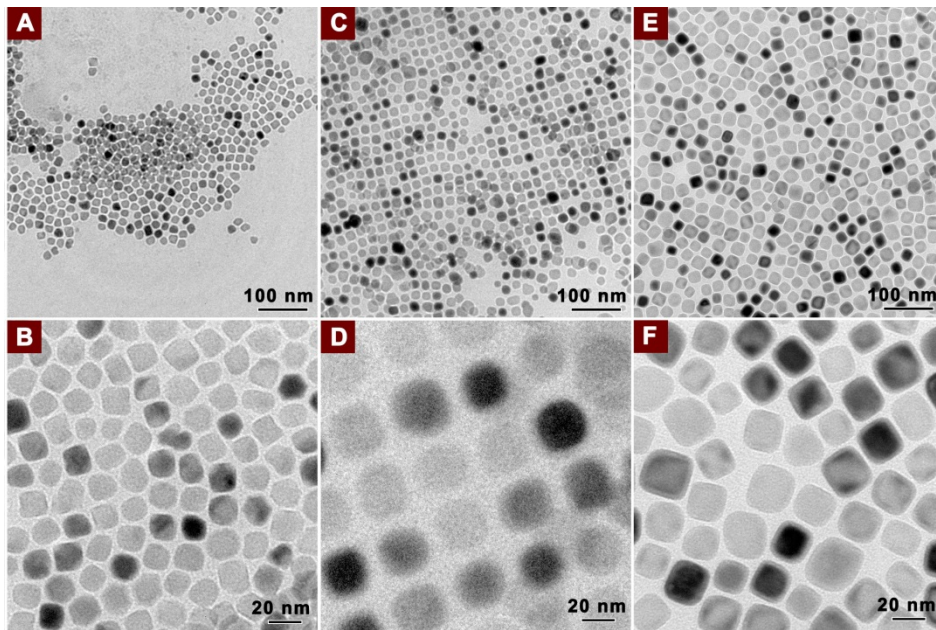

**Fig. S3** TEM images of CoFe<sub>2</sub>O<sub>4</sub> NCs synthesized for reaction time of 2 h at 290 °C (A, B), 310 °C (C, D), and 330 °C (E, F).

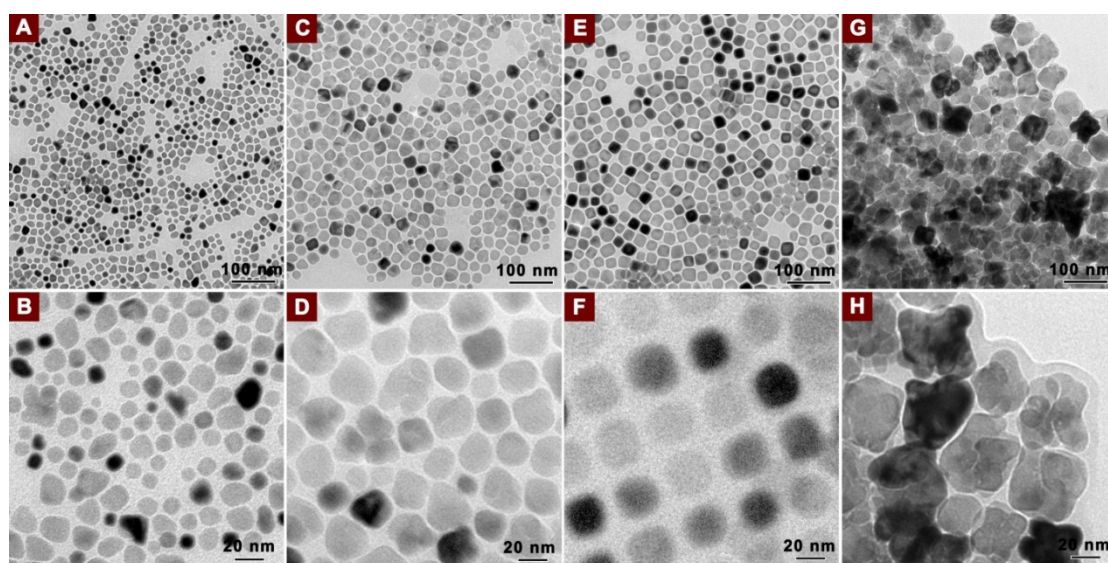

**Fig. S4** TEM images of CoFe<sub>2</sub>O<sub>4</sub> NCs synthesized at 310 °C for reaction time of 0.5 h (A, B), 1 h (C, D), 2 h (E, F), and 4 h (G, H).
